# Supplementary material for: Interactions between Human Gut Microbiome Dynamics and Sub-Optimal Health Symptoms during Seafaring Expeditions
Source: PubMed Central journal article supplement (PMC8754112; doi:10.1128/spectrum.00925-21), 2022-01-12
Supplement: spectrum00925-21_supp_1_seq6.pdf [file spectrum00925-21_supp_1_seq6.pdf]

1  
2  
3  
4  
5  
6  
7  
8  
9  
10  
11  
12  
13  
14  
15  
16  
17

## Supplementary Materials for

# **Interactions between human gut microbiome dynamics and sub-optimal health symptoms during seafaring expeditions**

### **The additional tables include:**

Table S1. Annotation for microbial species in the co-occurrence network

Table S2. The important score of the 28 microbial species and functions used in the Random Forest model

Table S3. Definitions of the 24 indicators in the questionnaire

Table S4. The questionnaire answers for all individuals before and after the voyage

### **The supplementary figures include:**

Figure S1. Comparison of individual perturbations in the gut microbiome between ‘symptomless’ and ‘symptom’ crew members for 24 indicators (symptoms)

Figure S2. Co-occurrence networks of the SS and non-SS at beginning (day 1) and end (day 135) of the voyage

### **Reference**

**Table S1. Annotation for microbial species in the co-occurrence network.**

| <b>Nodes ID</b> | <b>Species name (annotation in mOTUs2)</b>                   | <b>Nodes ID</b> | <b>Species name (annotation in mOTUs2)</b>                   |
|-----------------|--------------------------------------------------------------|-----------------|--------------------------------------------------------------|
| S0004           | Clostridiales species incertae sedis [meta_mOTU_v25_13280]   | S0716           | Coprobacter fastidiosus [ref_mOTU_v25_03667]                 |
| S0008           | Faecalibacterium prausnitzii [ref_mOTU_v25_06109]            | S0720           | Ruminococcaceae species incertae sedis [meta_mOTU_v25_13151] |
| S0019           | Bacteroides cellulosilyticus/fragilis [ref_mOTU_v25_01597]   | S0723           | Eubacterium sp. CAG:180 [ref_mOTU_v25_07675]                 |
| S0030           | Bacteroides plebeius [ref_mOTU_v25_05069]                    | S0727           | [Ruminococcus] torques [ref_mOTU_v25_03703]                  |
| S0032           | Clostridiales species incertae sedis [meta_mOTU_v25_13006]   | S0735           | Dorea longicatena [ref_mOTU_v25_03692]                       |
| S0033           | Clostridiales species incertae sedis [meta_mOTU_v25_12707]   | S0736           | Clostridiales species incertae sedis [meta_mOTU_v25_12434]   |
| S0052           | Ruminococcus bicirculans [ref_mOTU_v25_02792]                | S0749           | Bacteroides coprocola [ref_mOTU_v25_11279]                   |
| S0060           | Coprococcus eutactus [ref_mOTU_v25_02378]                    | S0752           | [Eubacterium] hallii [ref_mOTU_v25_03632]                    |
| S0082           | Proteobacteria sp. [ref_mOTU_v25_00095]                      | S0754           | Dorea longicatena [ref_mOTU_v25_03693]                       |
| S0085           | Clostridiales species incertae sedis [meta_mOTU_v25_13168]   | S0756           | Bacteroides coprophilus [ref_mOTU_v25_04094]                 |
| S0093           | Clostridiales species incertae sedis [meta_mOTU_v25_12253]   | S0761           | Faecalibacterium prausnitzii [ref_mOTU_v25_06108]            |
| S0094           | Firmicutes sp. [ref_mOTU_v25_03629]                          | S0763           | Clostridium sp. CAG:127 [meta_mOTU_v25_12306]                |
| S0100           | Clostridiales species incertae sedis [meta_mOTU_v25_12356]   | S0766           | Bacteroides finegoldii [ref_mOTU_v25_03474]                  |
| S0103           | Sutterella sp. CAG:351 [meta_mOTU_v25_13411]                 | S0769           | Prevotella sp. CAG:279 [meta_mOTU_v25_12279]                 |
| S0114           | Blautia obeum/wexlerae [ref_mOTU_v25_02154]                  | S0770           | Roseburia inulinivorans [ref_mOTU_v25_00860]                 |
| S0115           | Clostridium sp. AT4 [meta_mOTU_v25_12609]                    | S0772           | Firmicutes sp. [ref_mOTU_v25_02374]                          |
| S0116           | Paraprevotella xylaniphila [ref_mOTU_v25_03699]              | S0777           | Roseburia sp. CAG:303 [meta_mOTU_v25_12911]                  |
| S0117           | Pasteurellaceae species incertae sedis [meta_mOTU_v25_13253] | S0781           | Eubacterium sp. CAG:156 [ref_mOTU_v25_07673]                 |
| S0124           | Clostridiales species incertae sedis [meta_mOTU_v25_12252]   | S0785           | Clostridiales species incertae sedis [meta_mOTU_v25_12265]   |
| S0127           | Bifidobacterium pseudocatenulatum [ref_mOTU_v25_02700]       | S0792           | Prevotella stercora [ref_mOTU_v25_00717]                     |
| S0129           | [Ruminococcus] gnavus [ref_mOTU_v25_01594]                   | S0794           | Clostridium sp. CAG:492 [meta_mOTU_v25_12462]                |
| S0134           | Ruminococcaceae species incertae sedis [meta_mOTU_v25_12664] | S0804           | Oscillibacter sp. 57_20 [meta_mOTU_v25_12282]                |
| S0144           | Paraprevotella clara [ref_mOTU_v25_03698]                    | S0812           | Roseburia sp. 40_7 [meta_mOTU_v25_12352]                     |
| S0146           | Eubacterium species incertae sedis [meta_mOTU_v25_12474]     | S0814           | [Clostridium] clostridioforme/bolteae [ref_mOTU_v25_03442]   |
| S0148           | Bacteroides massiliensis [ref_mOTU_v25_02135]                | S0837           | Clostridiales species incertae sedis [meta_mOTU_v25_12301]   |
| S0151           | Clostridiales species incertae sedis [meta_mOTU_v25_12873]   | S0840           | Firmicutes bacterium CAG:227 [ref_mOTU_v25_07734]            |
| S0155           | Ruminococcaceae species incertae sedis [meta_mOTU_v25_12259] | S0842           | Roseburia sp. [ref_mOTU_v25_03650]                           |
| S0156           | Clostridiales species incertae sedis [meta_mOTU_v25_12452]   | S0850           | Clostridiales species incertae sedis [meta_mOTU_v25_12361]   |
| S0164           | uncultured Butyricoccus sp. [ref_mOTU_v25_07314]             | S0853           | Ruminococcaceae species incertae sedis [meta_mOTU_v25_12239] |
| S0167           | Clostridium sp. CAG:217 [meta_mOTU_v25_12270]                | S0867           | Clostridiales species incertae sedis [meta_mOTU_v25_12288]   |
| S0191           | [Ruminococcus] torques [ref_mOTU_v25_03659]                  | S0868           | Clostridiales species incertae sedis [meta_mOTU_v25_12229]   |
| S0197           | Butyricoccus species incertae sedis [meta_mOTU_v25_12336]    | S0874           | Veillonella parvula [ref_mOTU_v25_01938]                     |
| S0198           | Streptococcus sp. [ref_mOTU_v25_00283]                       | S0881           | Clostridiales species incertae sedis [meta_mOTU_v25_13200]   |
| S0204           | Oscillibacter sp. [ref_mOTU_v25_03341]                       | S0883           | Odoribacter splanchnicus [ref_mOTU_v25_03697]                |
| S0207           | Prevotella species incertae sedis [meta_mOTU_v25_12332]      | S0890           | Holdemanella biformis [meta_mOTU_v25_12329]                  |
| S0211           | Clostridiales species incertae sedis [meta_mOTU_v25_12522]   | S0899           | Bacteria sp. [ref_mOTU_v25_00077]                            |
| S0214           | Bifidobacterium adolescentis [ref_mOTU_v25_02703]            | S0907           | Bacteroides stercoris [ref_mOTU_v25_01579]                   |
| S0229           | Clostridiales species incertae sedis [meta_mOTU_v25_12251]   | S0916           | Clostridiales species incertae sedis [meta_mOTU_v25_12476]   |
| S0236           | Enterobacteriaceae sp. [ref_mOTU_v25_00096]                  | S0924           | Alistipes putredinis [ref_mOTU_v25_03683]                    |
| S0240           | Eubacterium sp. CAG:38 [ref_mOTU_v25_07679]                  | S0932           | Clostridiales species incertae sedis [meta_mOTU_v25_13187]   |
| S0247           | Ruminococcus sp. CAG:177 [meta_mOTU_v25_12400]               | S0939           | Haemophilus influenzae/parainfluenzae [ref_mOTU_v25_01068]   |
| S0253           | Holdemanella biformis [ref_mOTU_v25_11382]                   | S0952           | Roseburia species incertae sedis [meta_mOTU_v25_12366]       |
| S0255           | Bacteroides caccae [ref_mOTU_v25_03473]                      | S0959           | Bifidobacterium ruminantium [ref_mOTU_v25_02702]             |
| S0257           | Eubacterium sp. CAG:274 [meta_mOTU_v25_12688]                | S0967           | Blautia massiliensis [ref_mOTU_v25_03342]                    |
| S0262           | Eubacterium ramulus [ref_mOTU_v25_03570]                     | S0970           | Clostridiales species incertae sedis [meta_mOTU_v25_14166]   |
| S0264           | Alistipes finegoldii [ref_mOTU_v25_03682]                    | S0971           | Clostridium species incertae sedis [meta_mOTU_v25_12350]     |

|              |                                                               |              |                                                               |
|--------------|---------------------------------------------------------------|--------------|---------------------------------------------------------------|
| <b>S0269</b> | Flavonifractor plautii [ref_mOTU_v25_02971]                   | <b>S0972</b> | uncultured Flavonifractor sp. [ref_mOTU_v25_07315]            |
| <b>S0271</b> | Acinetobacter sp. [ref_mOTU_v25_03673]                        | <b>S0973</b> | Flavonifractor plautii [ref_mOTU_v25_05238]                   |
| <b>S0272</b> | Firmicutes sp. [ref_mOTU_v25_03641]                           | <b>S0974</b> | Alistipes shahii [ref_mOTU_v25_01014]                         |
| <b>S0274</b> | Bacteroidales species incertae sedis [meta_mOTU_v25_13286]    | <b>S0981</b> | Bacteroides faecis/thetaiotaomicron [ref_mOTU_v25_01657]      |
| <b>S0277</b> | Butyricoccus species incertae sedis [meta_mOTU_v25_12617]     | <b>S0994</b> | Bacteroides salyersiae [ref_mOTU_v25_02140]                   |
| <b>S0279</b> | Bifidobacterium longum [ref_mOTU_v25_01099]                   | <b>S1006</b> | Bacteroides fragilis [ref_mOTU_v25_01598]                     |
| <b>S0287</b> | Ruminococcus lactaris [ref_mOTU_v25_01595]                    | <b>S1016</b> | Clostridiales species incertae sedis [meta_mOTU_v25_13390]    |
| <b>S0303</b> | Clostridium sp. CAG:230 [ref_mOTU_v25_07616]                  | <b>S1018</b> | Clostridiales species incertae sedis [meta_mOTU_v25_12463]    |
| <b>S0305</b> | Clostridiales species incertae sedis [meta_mOTU_v25_12631]    | <b>S1019</b> | Clostridium sp. CAG:7 [ref_mOTU_v25_07647]                    |
| <b>S0306</b> | Blautia obeum [ref_mOTU_v25_05140]                            | <b>S1021</b> | Collinsella aerofaciens [ref_mOTU_v25_03626]                  |
| <b>S0308</b> | Clostridium sp. [ref_mOTU_v25_03622]                          | <b>S1023</b> | Sutterella wadsworthensis [ref_mOTU_v25_04772]                |
| <b>S0310</b> | Burkholderiales species incertae sedis [meta_mOTU_v25_12785]  | <b>S1034</b> | Eubacterium ventriosum [ref_mOTU_v25_11151]                   |
| <b>S0321</b> | Lachnospiraceae species incertae sedis [meta_mOTU_v25_12240]  | <b>S1043</b> | Roseburia intestinalis [ref_mOTU_v25_03702]                   |
| <b>S0327</b> | Clostridium species incertae sedis [meta_mOTU_v25_12399]      | <b>S1047</b> | Clostridium sp. CAG:138 [meta_mOTU_v25_12233]                 |
| <b>S0344</b> | Eubacterium sp. CAG:202 [meta_mOTU_v25_12308]                 | <b>S1052</b> | Prevotella sp. CAG:520 [ref_mOTU_v25_00718]                   |
| <b>S0357</b> | Roseburia hominis [ref_mOTU_v25_00861]                        | <b>S1053</b> | Alistipes ihumii [ref_mOTU_v25_07379]                         |
| <b>S0363</b> | Oscillibacter sp. [ref_mOTU_v25_04664]                        | <b>S1059</b> | Clostridiales species incertae sedis [meta_mOTU_v25_12411]    |
| <b>S0367</b> | Clostridium sp. CAG:58 [ref_mOTU_v25_07640]                   | <b>S1065</b> | Clostridiales sp. [ref_mOTU_v25_03634]                        |
| <b>S0389</b> | Faecalibacterium species incertae sedis [meta_mOTU_v25_12303] | <b>S1066</b> | Clostridiales species incertae sedis [meta_mOTU_v25_12653]    |
| <b>S0400</b> | Faecalibacterium species incertae sedis [meta_mOTU_v25_12325] | <b>S1067</b> | Bacteroides caecimuris [ref_mOTU_v25_03476]                   |
| <b>S0401</b> | Streptococcus parasanguinis [ref_mOTU_v25_00312]              | <b>S1069</b> | Clostridiales species incertae sedis [meta_mOTU_v25_12554]    |
| <b>S0403</b> | Clostridiales species incertae sedis [meta_mOTU_v25_12742]    | <b>S1070</b> | Ruminococcaceae species incertae sedis [meta_mOTU_v25_12264]  |
| <b>S0406</b> | Romboutsia timonensis [ref_mOTU_v25_09389]                    | <b>S1075</b> | Clostridiales species incertae sedis [meta_mOTU_v25_12635]    |
| <b>S0421</b> | Ruminococcus callidus [ref_mOTU_v25_11153]                    | <b>S1078</b> | Bacteroidales species incertae sedis [meta_mOTU_v25_13098]    |
| <b>S0433</b> | Coprococcus catus [ref_mOTU_v25_11851]                        | <b>S1082</b> | Clostridium sp. CAG:302 [meta_mOTU_v25_12499]                 |
| <b>S0436</b> | Clostridiales species incertae sedis [meta_mOTU_v25_13377]    | <b>S1091</b> | Firmicutes species incertae sedis [meta_mOTU_v25_12231]       |
| <b>S0437</b> | Eubacterium species incertae sedis [meta_mOTU_v25_12314]      | <b>S1092</b> | Ruminococcus sp. CAG:254 [meta_mOTU_v25_12276]                |
| <b>S0440</b> | Clostridiales species incertae sedis [meta_mOTU_v25_12473]    | <b>S1102</b> | Clostridiales species incertae sedis [meta_mOTU_v25_14118]    |
| <b>S0448</b> | Streptococcus sp. [ref_mOTU_v25_01350]                        | <b>S1114</b> | Fusobacterium mortiferum [ref_mOTU_v25_11278]                 |
| <b>S0450</b> | Clostridium sp. CAG:299 [ref_mOTU_v25_07619]                  | <b>S1122</b> | Firmicutes bacterium CAG:102 [ref_mOTU_v25_07726]             |
| <b>S0452</b> | Faecalibacterium prausnitzii [ref_mOTU_v25_06110]             | <b>S1123</b> | Parabacteroides merdae [ref_mOTU_v25_05401]                   |
| <b>S0488</b> | Parabacteroides distansoni [ref_mOTU_v25_03640]               | <b>S1142</b> | Clostridiales species incertae sedis [meta_mOTU_v25_12309]    |
| <b>S0489</b> | Alistipes obesi [ref_mOTU_v25_06695]                          | <b>S1145</b> | Firmicutes bacterium CAG:114 [ref_mOTU_v25_07728]             |
| <b>S0493</b> | Clostridiales species incertae sedis [meta_mOTU_v25_12563]    | <b>S1149</b> | Ruminococcus bromii [ref_mOTU_v25_00853]                      |
| <b>S0512</b> | [Clostridium] leptum [ref_mOTU_v25_03688]                     | <b>S1159</b> | Clostridiales sp. [ref_mOTU_v25_03658]                        |
| <b>S0519</b> | Anaerostipes hadrus [ref_mOTU_v25_00857]                      | <b>S1160</b> | Ruminococcus species incertae sedis [meta_mOTU_v25_12766]     |
| <b>S0520</b> | Blautia obeum [ref_mOTU_v25_05139]                            | <b>S1161</b> | Bacteroides dorei/vulgatus [ref_mOTU_v25_02367]               |
| <b>S0526</b> | Sutterella wadsworthensis [ref_mOTU_v25_03066]                | <b>S1167</b> | Faecalibacterium species incertae sedis [meta_mOTU_v25_12403] |
| <b>S0548</b> | [Eubacterium] eligens [ref_mOTU_v25_02376]                    | <b>S1168</b> | Bacteroides intestinalis [ref_mOTU_v25_02809]                 |
| <b>S0551</b> | Allisonella histaminiformans [ref_mOTU_v25_10689]             | <b>S1186</b> | Clostridium species incertae sedis [meta_mOTU_v25_12324]      |
| <b>S0562</b> | Clostridiales species incertae sedis [meta_mOTU_v25_13227]    | <b>S1187</b> | Clostridiales species incertae sedis [meta_mOTU_v25_12786]    |
| <b>S0572</b> | Clostridium sp. [ref_mOTU_v25_03680]                          | <b>S1190</b> | Bacteroidales species incertae sedis [meta_mOTU_v25_12262]    |
| <b>S0578</b> | Coprococcus sp. [ref_mOTU_v25_01683]                          | <b>S1191</b> | Clostridiales species incertae sedis [meta_mOTU_v25_12674]    |
| <b>S0585</b> | Alistipes finegoldii/onderdonkii [ref_mOTU_v25_03069]         | <b>S1193</b> | unclassified                                                  |
| <b>S0588</b> | Barnesiella intestinhominis [ref_mOTU_v25_03595]              | <b>S1194</b> | Clostridiales sp. [ref_mOTU_v25_03605]                        |
| <b>S0590</b> | Dialister sp. CAG:357 [meta_mOTU_v25_12661]                   | <b>S1208</b> | Oscillibacter sp. 57_20 [meta_mOTU_v25_12610]                 |
| <b>S0596</b> | Eubacterium sp. [ref_mOTU_v25_03633]                          | <b>S1209</b> | Faecalibacterium sp. [ref_mOTU_v25_03636]                     |
| <b>S0602</b> | Blautia hansenii [ref_mOTU_v25_03670]                         | <b>S1215</b> | Coprococcus comes [ref_mOTU_v25_03690]                        |
| <b>S0606</b> | Clostridium species incertae sedis [meta_mOTU_v25_12762]      | <b>S1225</b> | [Eubacterium] eligens [ref_mOTU_v25_02375]                    |

|              |                                                              |              |                                                            |
|--------------|--------------------------------------------------------------|--------------|------------------------------------------------------------|
| <b>S0610</b> | Clostridium species incertae sedis [meta_mOTU_v25_12640]     | <b>S1227</b> | Dorea formicigenerans [ref_mOTU_v25_03668]                 |
| <b>S0615</b> | Bacteroides eggerthii [ref_mOTU_v25_01577]                   | <b>S1232</b> | Clostridiales species incertae sedis [meta_mOTU_v25_12556] |
| <b>S0622</b> | Ruminococcaceae species incertae sedis [meta_mOTU_v25_12286] | <b>S1243</b> | Ruthenibacterium lactatiformans [ref_mOTU_v25_04716]       |
| <b>S0653</b> | Enterobacterales sp. [ref_mOTU_v25_00085]                    | <b>S1248</b> | Clostridiales species incertae sedis [meta_mOTU_v25_12437] |
| <b>S0657</b> | [Eubacterium] rectale [ref_mOTU_v25_03657]                   | <b>S1257</b> | Clostridiales species incertae sedis [meta_mOTU_v25_12284] |
| <b>S0663</b> | Clostridiales species incertae sedis [meta_mOTU_v25_12776]   | <b>S1259</b> | bacterium LF-3 [ref_mOTU_v25_03628]                        |
| <b>S0677</b> | Clostridiales species incertae sedis [meta_mOTU_v25_13012]   | <b>S1264</b> | Anaerostipes hadrus [ref_mOTU_v25_00856]                   |
| <b>S0679</b> | Bacteroides sp. [ref_mOTU_v25_03475]                         | <b>S1265</b> | Phascolarctobacterium succinatutens [ref_mOTU_v25_03700]   |
| <b>S0681</b> | Faecalibacterium prausnitzii [ref_mOTU_v25_06112]            | <b>S1267</b> | Eubacterium species incertae sedis [meta_mOTU_v25_12260]   |
| <b>S0684</b> | Bacteroides rodentium/uniformis [ref_mOTU_v25_00855]         | <b>S1276</b> | Ruminococcus sp. [ref_mOTU_v25_03681]                      |
| <b>S0698</b> | Clostridiales species incertae sedis [meta_mOTU_v25_13863]   | <b>S1277</b> | Oscillibacter species incertae sedis [meta_mOTU_v25_12353] |
| <b>S0699</b> | Prevotella copri [ref_mOTU_v25_03701]                        | <b>S1287</b> | Bacteroides sp. [ref_mOTU_v25_02810]                       |
| <b>S0703</b> | Bilophila wadsworthia [ref_mOTU_v25_04300]                   | <b>S1289</b> | [Ruminococcus] torques [ref_mOTU_v25_03660]                |
| <b>S0709</b> | Bifidobacterium bifidum [ref_mOTU_v25_03116]                 | <b>S1293</b> | Firmicutes species incertae sedis [meta_mOTU_v25_12744]    |
| <b>S0710</b> | Parasutterella excrementihominis [ref_mOTU_v25_03674]        | <b>S1294</b> | Megamonas funiformis/ruptellensis [ref_mOTU_v25_02318]     |
| <b>S0711</b> | Clostridium species incertae sedis [meta_mOTU_v25_12234]     |              |                                                            |

20 **Table S2. The important score of the 28 microbial species and functions used in**  
 21 **the Random Forest model.**

| ID                               | Name                                                                                                                                                                        | Importance | Mean for those with ocean-going syndrome | mean for the 'symptomless' group |
|----------------------------------|-----------------------------------------------------------------------------------------------------------------------------------------------------------------------------|------------|------------------------------------------|----------------------------------|
| K17076                           | Environmental Information Processing; Membrane transport; ABC transporters; lysY; putative lysine transport system ATP-binding protein                                      | 0.0102     | 7.71E-05                                 | 1.43E-04                         |
| K17074                           | Environmental Information Processing; Membrane transport; ABC transporters; lysX2; putative lysine transport system permease protein                                        | 0.0100     | 8.06E-05                                 | 1.48E-04                         |
| K17073                           | Environmental Information Processing; Membrane transport; ABC transporters; lysX1; putative lysine transport system substrate-binding protein                               | 0.0117     | 7.16E-05                                 | 1.35E-04                         |
| K11928                           | Brite Hierarchies; Protein families: signaling and cellular processes; Transporters; putP; sodium/proline symporter                                                         | 0.0104     | 3.50E-04                                 | 4.39E-04                         |
| K10118                           | Environmental Information Processing; Membrane transport; ABC transporters; msmF; raffinose/stachyose/melibiose transport system permease protein                           | 0.0095     | 8.21E-04                                 | 1.11E-03                         |
| K09815                           | Environmental Information Processing; Membrane transport; ABC transporters; znuA; zinc transport system substrate-binding protein                                           | 0.0104     | 2.02E-04                                 | 2.65E-04                         |
| K07727                           | Brite Hierarchies; Protein families: genetic information processing; Transcription factors; putative transcriptional regulator                                              | 0.0044     | 4.69E-04                                 | 5.05E-04                         |
| K07080                           | Not Included in Pathway or Brite; Poorly characterized; Function unknown; uncharacterized protein                                                                           | 0.0192     | 1.40E-04                                 | 2.09E-04                         |
| K06379                           | Not Included in Pathway or Brite; Unclassified: metabolism; Enzymes with EC numbers; spoIIAB; stage II sporulation protein AB (anti-sigma F factor)                         | 0.0157     | 4.52E-04                                 | 5.42E-04                         |
| K06188                           | Brite Hierarchies; Protein families: signaling and cellular processes; Transporters; aqpZ; aquaporin Z                                                                      | 0.0027     | 7.33E-05                                 | 5.51E-05                         |
| K04023                           | Not Included in Pathway or Brite; Unclassified: metabolism; Amino acid metabolism; eutH; ethanolamine transporter                                                           | 0.0057     | 4.73E-05                                 | 1.87E-05                         |
| K03496                           | Brite Hierarchies; Protein families: genetic information processing; Chromosome and associated proteins; parA, soj; chromosome partitioning protein                         | 0.0060     | 2.76E-03                                 | 3.11E-03                         |
| K03466                           | Brite Hierarchies; Protein families: genetic information processing; Chromosome and associated proteins; ftsK, spoIIIE; DNA segregation ATPase FtsK/SpoIIIE, S-DNA-T family | 0.0149     | 2.39E-04                                 | 3.63E-04                         |
| K03458                           | Not Included in Pathway or Brite; Unclassified: signaling and cellular processes; Transport; TC.NCS2; nucleobase:cation symporter-2, NCS2 family                            | 0.0061     | 1.30E-04                                 | 1.85E-04                         |
| K02662                           | Brite Hierarchies; Protein families: signaling and cellular processes; Secretion system; pilM; type IV pilus assembly protein PilM                                          | 0.0061     | 8.92E-05                                 | 1.29E-04                         |
| K02408                           | Cellular Processes; Cell motility; Flagellar assembly; fliE; flagellar hook-basal body complex protein FliE                                                                 | 0.0046     | 1.96E-04                                 | 2.42E-04                         |
| K01787                           | Metabolism; Carbohydrate metabolism; Amino sugar and nucleotide sugar metabolism; RENBP; N-acetylglucosamine 2-epimerase                                                    | 0.0023     | 1.43E-04                                 | 1.93E-04                         |
| K01775                           | Metabolism; Metabolism of other amino acids; D-Alanine metabolism; alr; alanine racemase                                                                                    | 0.0062     | 4.99E-04                                 | 5.50E-04                         |
| K01278                           | Organismal Systems; Digestive system; Protein digestion and absorption; DPP4, CD26; dipeptidyl-peptidase 4                                                                  | 0.0006     | 1.61E-05                                 | 2.35E-05                         |
| K01182                           | Metabolism; Carbohydrate metabolism; Galactose metabolism; IMA, malL; oligo-1,6-glucosidase                                                                                 | 0.0060     | 3.74E-04                                 | 3.84E-04                         |
| K00865                           | Metabolism; Carbohydrate metabolism; Glyoxylate and dicarboxylate metabolism; glxK, garK; glycerate 2-kinase                                                                | 0.0037     | 5.23E-04                                 | 4.79E-04                         |
| K00806                           | Metabolism; Glycan biosynthesis and metabolism; Peptidoglycan biosynthesis; uppS; undecaprenyl diphosphate synthase                                                         | 0.0152     | 6.21E-04                                 | 7.59E-04                         |
| K00171                           | Metabolism; Carbohydrate metabolism; Glycolysis / Gluconeogenesis; porD; pyruvate ferredoxin oxidoreductase delta subunit                                                   | 0.0047     | 3.15E-05                                 | 2.72E-05                         |
| <i>Eubacterium sp. CAG 192</i>   | <i>Eubacterium sp. CAG 192</i>                                                                                                                                              | 0.0016     | 0.00E+00                                 | 5.33E-06                         |
| <i>uncultured Blautia sp.</i>    | <i>uncultured Blautia sp.</i>                                                                                                                                               | 0.0025     | 3.96E-05                                 | 1.74E-05                         |
| <i>Eubacterium ventriosum</i>    | <i>Eubacterium ventriosum</i>                                                                                                                                               | 0.0059     | 1.35E-03                                 | 7.88E-04                         |
| <i>Actinomyces viscosus oris</i> | <i>Actinomyces viscosus oris</i>                                                                                                                                            | 0.0050     | 2.64E-06                                 | 1.53E-05                         |

22

23 **Table S3. Definitions of the 24 indicators in the questionnaire.**

| Indicator                     | Definition                                                                                                                                                                                                                                                                                                |
|-------------------------------|-----------------------------------------------------------------------------------------------------------------------------------------------------------------------------------------------------------------------------------------------------------------------------------------------------------|
| Body mass index (BMI)         | The BMI is defined as the body mass divided by the square of the body height (1).                                                                                                                                                                                                                         |
| Backache                      | Back pain, also known as backache, is pain felt in the back (2).                                                                                                                                                                                                                                          |
| Headache                      | It is usually confined to the upper part of the head, including the upper edge of the eyebrow arch, the helix and the pain above the line connecting the external occipital protuberance (3).                                                                                                             |
| Stomachache                   | Stomach pain refers to the pain in the epigastric part of the upper abdomen, above the connection line between the lower edges of ribs on both sides and near the heart socket under the xiphoid process (4).                                                                                             |
| Pectoralgia                   | Pectoralgia is a subjective feeling, feeling chest pain, severe pain, dull pain, stuffy pain or oppressive feeling (5).                                                                                                                                                                                   |
| Muscular soreness             | Pain or tenderness in one or more muscles which can involve any area of the body.                                                                                                                                                                                                                         |
| Dyspnea                       | Dyspnea is a combination of subjective feeling and objective signs. Subjectively, breathing is laborious, objectively, the number of breaths increases, the movement is fast and the range increases (6).                                                                                                 |
| Palpitation                   | Palpitation includes palpitation and palpitation, which is a kind of uncomfortable feeling or palpitation of conscious heart beating (7).                                                                                                                                                                 |
| Insomnia                      | Insomnia is medically defined as being unable to fall asleep or remain asleep, resulting in insufficient sleep (8).                                                                                                                                                                                       |
| Shallow sleep                 | Difficulty in falling asleep, decreased sleep quality and sleep time.                                                                                                                                                                                                                                     |
| Over-eating                   | Overeating means taking a huge amount of food in a very short time (9).                                                                                                                                                                                                                                   |
| Nausea                        | Nausea is a kind of gastric discomfort that can cause vomiting impulse (10).                                                                                                                                                                                                                              |
| Inactivity                    | People's mental and physical abilities are not as good as before, and will feel tired when they engage in daily activities (11).                                                                                                                                                                          |
| Poor appetite                 | Lack of appetite or lack the desire to eat (12).                                                                                                                                                                                                                                                          |
| Feelings of loneliness        | Loneliness is an unpleasant emotional response to perceived isolation (13).                                                                                                                                                                                                                               |
| Depression                    | Depression (mood), a state of low mood and aversion to activity (14).                                                                                                                                                                                                                                     |
| Self-accusation               | Self-accusation is a cognitive process in which an individual attributes the occurrence of a stressful event to oneself (15).                                                                                                                                                                             |
| Mistrustfulness               | Mistrustfulness is an individual's distrust of other people's words, promises and statements (16).                                                                                                                                                                                                        |
| Stool type                    | Type 1: Separate hard lumps (like nuts), or sausage-shaped (but lumpy); Type 2: Like a sausage but with cracks on its surface (can be black); Type 3: Like a sausage or snake, smooth and soft (average stool) Type 4: Soft blobs with clear cut edges; Type 5: A mushy stool or watery (diarrhoea) (17). |
| Bloody stools                 | The color of the stool is bright red, dark red or tar like (black stool) (18).                                                                                                                                                                                                                            |
| Incomplete defecation         | This term is a feeling of incomplete defecation. When defecating, even if the intestinal contents have been emptied, they still want to be discharged.                                                                                                                                                    |
| Bowel difficulties            | The defecation was laborious, painful and prolonged.                                                                                                                                                                                                                                                      |
| Bowel movement                | Want to defecate but can't row out, or squat down for a long time to row out (19).                                                                                                                                                                                                                        |
| Defecation frequency (weekly) | Frequency of defecation per week. The normal frequency of bowel movements in adults is between three per day and three per week (20).                                                                                                                                                                     |

24

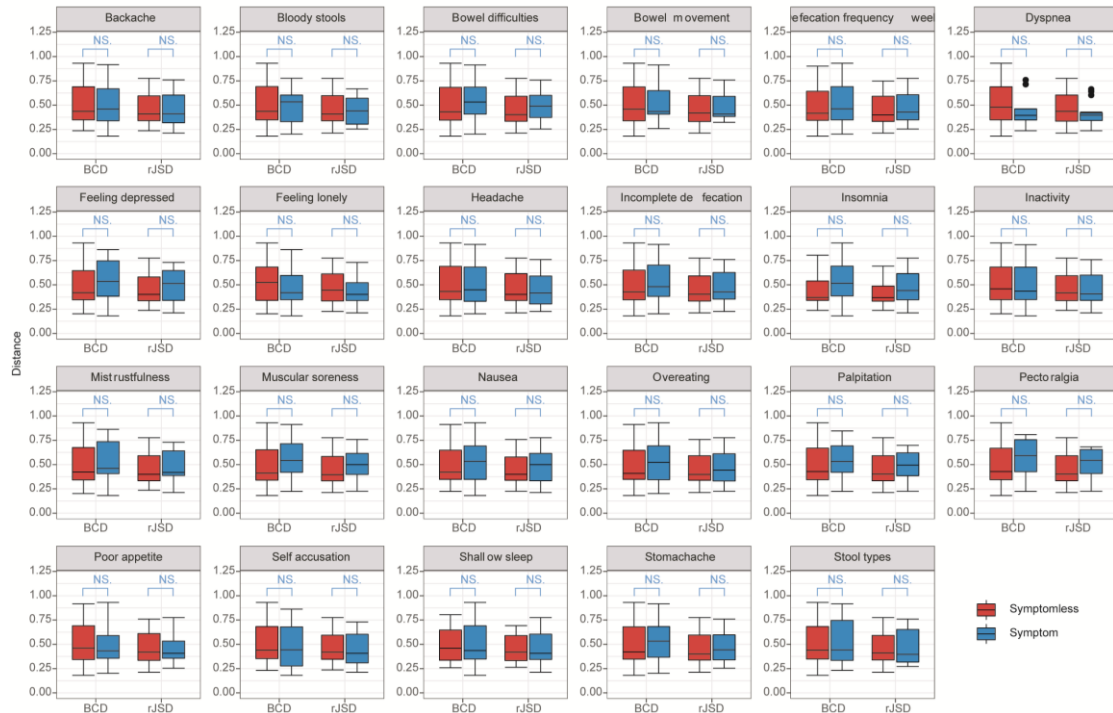

25 **Figure S1. Comparison of individual perturbations in the gut microbiome between**  
 26 **‘symptomless’ and ‘symptom’ crew members for 24 indicators (symptoms).**  
 27 Individual perturbations (n=77) in the gut microbiome measured by BCD and rJSD  
 28 were first grouped according to whether they were ‘symptomless’ or ‘symptom’ for  
 29 each individual health indicator (symptom), and then compared with each other using  
 30 Wilcoxon rank-sum Test.

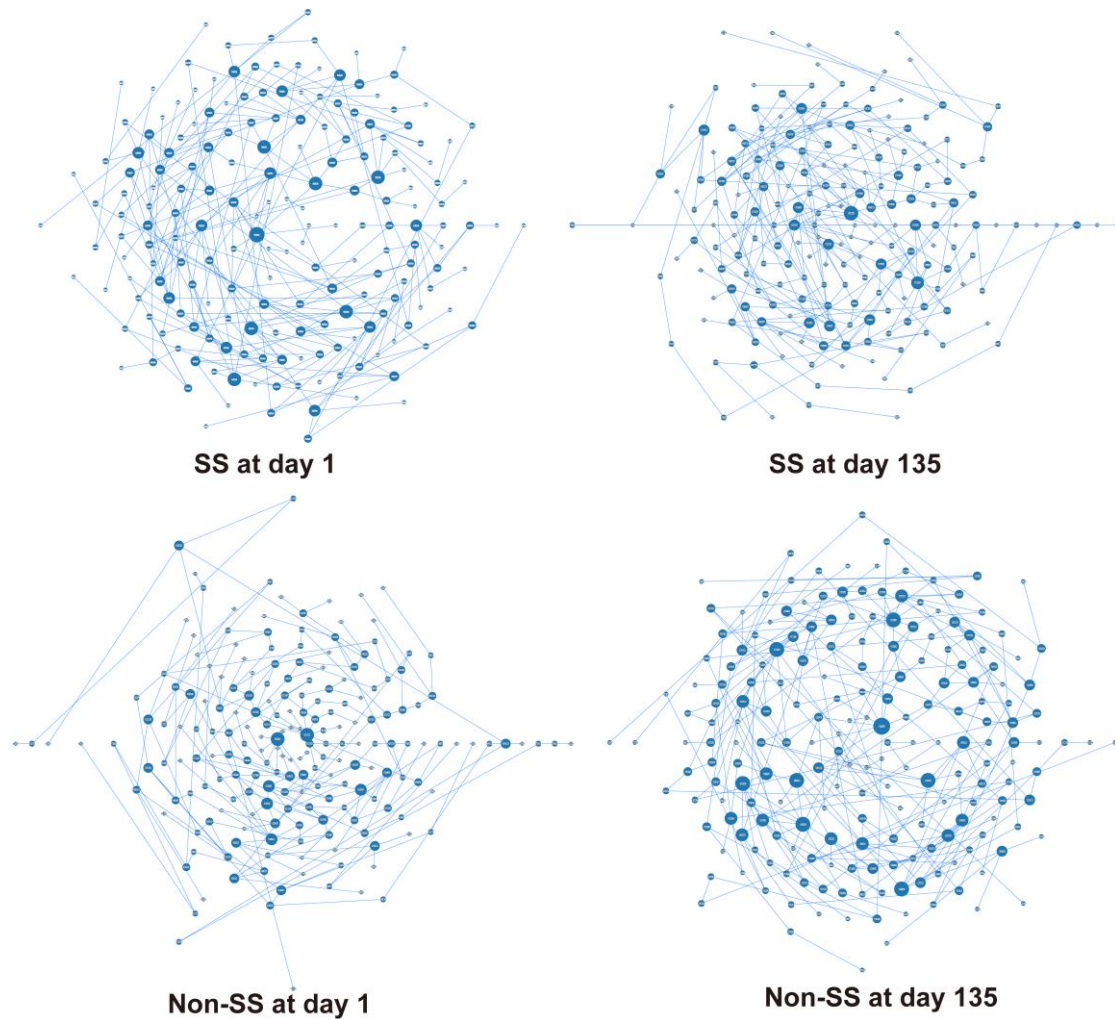

31 **Figure S2. Co-occurrence networks of SS and non-SS at beginning (day 1) and end**  
 32 **(day 135) of the voyage.** Four co-occurrence networks of SS and non-SS at the  
 33 beginning (day 1) and end (day 135) of the voyage are separately illustrated, which are  
 34 based on SparCC correlation inference algorithms. The nodes in the network refer to  
 35 the identified species with the size of the nodes indicating their relative abundance; The  
 36 edges between nodes represent correlations between the nodes they connect.



**REFERENCES**

- 38 1. Anonymous. 2016. Body Mass Index (BMI) Charts. *Pediatr Dent* 38:418-419.
- 39 2. Casazza BA. 2012. Diagnosis and treatment of acute low back pain. *Am Fam Physician* 85:343-  
40 50.
- 41 3. Rizzoli P, Mullally WJ. 2018. Headache. *Am J Med* 131:17-24.
- 42 4. Viniol A, Keunecke C, Biroga T, Stadje R, Dornieden K, Bösner S, Donner-Banzhoff N,  
43 Haasenritter J, Becker A. 2014. Studies of the symptom abdominal pain--a systematic review  
44 and meta-analysis. *Fam Pract* 31:517-29.
- 45 5. Horn B. 2015. [Chest pain]. *Ther Umsch* 72:62-5.
- 46 6. Anonymous. 1999. Dyspnea. Mechanisms, assessment, and management: a consensus  
47 statement. American Thoracic Society. *Am J Respir Crit Care Med* 159:321-40.
- 48 7. Giada F, Raviele A. 2018. Clinical Approach to Patients with Palpitations. *Card Electrophysiol*  
49 *Clin* 10:387-396.
- 50 8. Buysse DJ. 2013. Insomnia. *Jama* 309:706-16.
- 51 9. Engin A. 2017. Eat and Death: Chronic Over-Eating. *Adv Exp Med Biol* 960:53-80.
- 52 10. Metz A, Hebbard G. 2007. Nausea and vomiting in adults--a diagnostic approach. *Aust Fam*  
53 *Physician* 36:688-92.
- 54 11. Sharara E, Akik C, Ghattas H, Makhlof Obermeyer C. 2018. Physical inactivity, gender and  
55 culture in Arab countries: a systematic assessment of the literature. *BMC Public Health* 18:639.
- 56 12. van der Meij BS, Wijnhoven HAH, Lee JS, Houston DK, Hue T, Harris TB, Kritchevsky SB,  
57 Newman AB, Visser M. 2017. Poor Appetite and Dietary Intake in Community-Dwelling Older  
58 Adults. *J Am Geriatr Soc* 65:2190-2197.
- 59 13. Tabue Teguo M, Simo-Tabue N, Stoykova R, Meillon C, Cogne M, Amiéva H, Dartigues JF.  
60 2016. Feelings of Loneliness and Living Alone as Predictors of Mortality in the Elderly: The  
61 PAQUID Study. *Psychosom Med* 78:904-909.
- 62 14. Cui R. 2015. Editorial: A Systematic Review of Depression. *Curr Neuropharmacol* 13:480.
- 63 15. Janoff-Bulman R. 1979. Characterological versus behavioral self-blame: inquiries into  
64 depression and rape. *J Pers Soc Psychol* 37:1798-809.
- 65 16. Greben SE. 1984. The re-establishment of trust through psychotherapy. *Can J Psychiatry*  
66 29:350-4.
- 67 17. Mínguez Pérez M, Benages Martínez A. 2009. The Bristol scale - a useful system to assess stool  
68 form? *Rev Esp Enferm Dig* 101:305-11.
- 69 18. Anonymous. 1990. *In* Walker HK, Hall WD, Hurst JW (ed), *Clinical Methods: The History,*  
70 *Physical, and Laboratory Examinations.* Butterworths Copyright © 1990, Butterworth  
71 Publishers, a division of Reed Publishing., Boston.
- 72 19. Holl RM. 2014. Bowel movement: the sixth vital sign. *Holist Nurs Pract* 28:195-7.
- 73 20. Panigrahi MK, Kar SK, Singh SP, Ghoshal UC. 2013. Defecation frequency and stool form in  
74 a coastal eastern Indian population. *J Neurogastroenterol Motil* 19:374-80.
